# Supplementary material for: HSA21 Single-Minded 2 (Sim2) Binding Sites Co-Localize with Super-Enhancers and Pioneer Transcription Factors in Pluripotent Mouse ES Cells
Source: PLoS One. 2015 May 8;10(5):e0126475. doi: 10.1371/journal.pone.0126475 (PMC4425456; doi:10.1371/journal.pone.0126475)
Supplement: S2 Table — (XLSX) [file pone.0126475.s004.xlsx]

## Sheet: Sheet1
Category	Term	Count	%	Genes	Fold Enrichment	PValue	Benjamini
Biological processes	GO:0031328~positive regulation of cellular biosynthetic process	85	4.57974	TLR1, MITF, TLR2, FOXO1, NFKB1, RORA, PAWR, GLI2, 9430076C15RIK, ZIC3, SHH, TLR9, CITED2, RAET1A, FOS, ATOH1, RAET1E, BARX2, TDGF1, IFNG, GUCY1A2, FAM129A, PITX2, ATF7IP, ICOSL, HSP90AA1, SOX11, RXRA, OTX2, TTF1, SIX4, PRKCQ, AYM1, VEGFA, SIX1, HMGB1, CNBP, SOX2, SOX5, NUFIP1, NFYC, NFYB, EHF, TCF7L1, PLAGL1, HOXA1, REL, NPM1, NFAT5, ETV1, POU3F2, DYRK2, MAML3, ETV5, ETV4, FOXD3, CD28, TRP53, MAF…	1.78224	1.69168e-07	0.000550322
	GO:0007155~cell adhesion	86	4.63362	NRP2, CLDN4, CADM1, CLDN3, ATP1B2, BCAR1, EDIL3, CNTNAP5C, CNTNAP5A, TGFB2, CDH22, CD47, CD96, CDH20, PCDH1, BARX2, FERT2, PARD3B, FNDC3A, NEGR1, DLG1, FGF4, PARVG, TYRO3, CNTN5, PDPN, BYSL, FBLIM1, PCDH9, MFGE8, PTPRU, NRXN1, AJAP1, MYH9, CTNNA1, BTBD9, JUP, TNFAIP6, NCAM2, ITGB1BP1, NPTN, ROR2, RELN, LAMC2, CNTN3, NCAN, CHL1, PARVB, EMCN, OLFM4, NINJ2, CTNND2, ITGB5, CD9, PVRL1, FAT3, FAT4, FAT…	1.77428	1.73688e-07	0.000282551
	GO:0022610~biological adhesion	86	4.63362	NRP2, CLDN4, CADM1, CLDN3, ATP1B2, BCAR1, EDIL3, CNTNAP5C, CNTNAP5A, TGFB2, CDH22, CD47, CD96, CDH20, PCDH1, BARX2, FERT2, PARD3B, FNDC3A, NEGR1, DLG1, FGF4, PARVG, TYRO3, CNTN5, PDPN, BYSL, FBLIM1, PCDH9, MFGE8, PTPRU, NRXN1, AJAP1, MYH9, CTNNA1, BTBD9, JUP, TNFAIP6, NCAM2, ITGB1BP1, NPTN, ROR2, RELN, LAMC2, CNTN3, NCAN, CHL1, PARVB, EMCN, OLFM4, NINJ2, CTNND2, ITGB5, CD9, PVRL1, FAT3, FAT4, FAT…	1.77113	1.88215e-07	0.000204129
	GO:0009891~positive regulation of biosynthetic process	85	4.57974	TLR1, MITF, TLR2, FOXO1, NFKB1, RORA, PAWR, GLI2, 9430076C15RIK, ZIC3, SHH, TLR9, CITED2, RAET1A, FOS, ATOH1, RAET1E, BARX2, TDGF1, IFNG, GUCY1A2, FAM129A, PITX2, ATF7IP, ICOSL, HSP90AA1, SOX11, RXRA, OTX2, TTF1, SIX4, PRKCQ, AYM1, VEGFA, SIX1, HMGB1, CNBP, SOX2, SOX5, NUFIP1, NFYC, NFYB, EHF, TCF7L1, PLAGL1, HOXA1, REL, NPM1, NFAT5, ETV1, POU3F2, DYRK2, MAML3, ETV5, ETV4, FOXD3, CD28, TRP53, MAF…	1.76625	2.51106e-07	0.000204254
	GO:0010557~positive regulation of macromolecule biosynthetic process	80	4.31034	TLR1, MITF, FOXO1, NFKB1, RORA, PAWR, GLI2, 9430076C15RIK, ZIC3, SHH, TLR9, CITED2, FOS, ATOH1, BARX2, TDGF1, IFNG, FAM129A, PITX2, ATF7IP, ICOSL, SOX11, RXRA, OTX2, TTF1, SIX4, PRKCQ, AYM1, VEGFA, SIX1, HMGB1, CNBP, SOX2, SOX5, NUFIP1, NFYC, NFYB, EHF, TCF7L1, PLAGL1, HOXA1, REL, NFAT5, ETV1, POU3F2, DYRK2, MAML3, ETV5, ETV4, FOXD3, CD28, MAF, KLF5, CEBPA, TRP53, IL6, KAT2B, RFX4, TBX3, KLF12, K…	1.74703	9.26859e-07	0.000603018
	GO:0045449~regulation of transcription	253	13.6315	RORA, REST, SHH, CITED2, TAF5L, CDCA7, NKX6-3, PHTF2, IFNG, CREB3L1, PITX2, L3MBTL4, RCOR2, RREB1, RXRA, RCOR1, HMG20A, PTRF, PRDM5, VEGFA, MNT, TGIF1, VGLL3, PRDM2, PRDM1, ZFP825, CRTC3, MYBL2, ZFP619, ZFP618, ZSCAN5B, PLAGL1, TRP53BP1, MAML3, HIP1, KLF5, MDFI, AEBP2, DNMT3A, KLF9, KLF12, KLF13, ESRRB, SMAD7, ASXL1, SMAD4, RYBP, SMAD2, ZBTB44, SFMBT2, NKX6-1, CSRNP2, RNF2, ETS2, TRPS1, ZFP740, A…	1.31488	1.06618e-06	0.000578056
	GO:0051173~positive regulation of nitrogen compound metabolic process	79	4.25647	MITF, TLR2, FOXO1, NFKB1, RORA, GLI2, 9430076C15RIK, SHH, ZIC3, CITED2, RAET1A, FOS, ATOH1, RAET1E, BARX2, GPX4, TDGF1, IFNG, GUCY1A2, PITX2, ATF7IP, HSP90AA1, SOX11, RXRA, OTX2, TTF1, SIX4, EYA1, AYM1, VEGFA, SIX1, HMGB1, CNBP, SOX2, SOX5, NUFIP1, NFYC, NFYB, EHF, TCF7L1, PLAGL1, HOXA1, REL, NFAT5, ETV1, POU3F2, MAML3, ETV5, ETV4, FOXD3, CD28, MAF, KLF5, CEBPA, TRP53, IL6, KAT2B, RFX4, TBX3, KLF…	1.73832	1.3419e-06	0.0006236
	GO:0060284~regulation of cell development	34	1.8319	RTN4, DRD3, SOX2, SOX5, REST, GLI2, MEIS1, SHH, LINGO1, ATOH1, MAPT, BCL2, POU3F2, TLX3, TRP53, TBX3, SMAD4, NLGN1, SMAD2, LMX1A, CTNNA1, NTN1, NKX6-1, HDAC4, VEGFC, EYA1, BTG1, SIX1, NPTN, TGIF1, PBX1, BMP7, IGFBP3, CACNA1A	2.47497	1.64459e-06	0.000668713
	GO:0042127~regulation of cell proliferation	80	4.31034	APOBEC1, FGF15, E2F7, MITF, PRRX1, FOXO1, PAWR, SKAP2, GLI2, SHH, TGFB2, SPRY2, ARHGAP5, CDCA7, TDGF1, IFNG, PDGFC, FGF1, DLG1, FGF4, PITX2, NANOG, ICOSL, LIFR, CTNNA1, VASH1, MYCN, TNS3, VEGFC, PRKCQ, CD38, CD80, BTG1, VEGFA, TGIF1, WNT5A, FGFR1, HMGB1, CNBP, SOX2, MSX2, CD9, BCL2, TEK, NPM1, RTKN2, POU3F2, EGF, FGFBP1, ETV4, SCG2, CD28, KLF5, CEBPA, TRP53, IL6, NF2, TBX3, JARID2, FLT4, NDFIP1, …	1.72106	1.69647e-06	0.000613181
	GO:0001763~morphogenesis of a branching structure	29	1.5625	GNA13, WNT5A, FGFR1, DICER1, CTNND2, GLI2, FEM1B, SHH, EDNRA, SPRY2, BCL2, TDGF1, EGF, ETV4, DLG1, PITX2, IL6, TBX3, COL13A1, SMAD4, KDR, MYCN, EYA1, NCOA3, LAMA5, VEGFA, SIX1, PBX1, BMP7	2.68519	2.08181e-06	0.000677193
	GO:0051254~positive regulation of RNA metabolic process	66	3.55603	MITF, FOXO1, NFKB1, RORA, GLI2, 9430076C15RIK, SHH, ZIC3, CITED2, FOS, ATOH1, BARX2, GPX4, IFNG, TDGF1, PITX2, ATF7IP, RXRA, SOX11, OTX2, TTF1, SIX4, AYM1, VEGFA, SIX1, HMGB1, CNBP, SOX2, SOX5, NFYC, NUFIP1, NFYB, EHF, TCF7L1, PLAGL1, HOXA1, REL, NFAT5, POU3F2, MAML3, FOXD3, MAF, CEBPA, TRP53, IL6, KAT2B, RFX4, TBX3, KLF12, KLF13, GSX1, TRIM28, SMAD4, TEAD1, NR4A1, CREB5, SMAD2, AFF1, HDAC4, MEOX…	1.82313	2.2263e-06	0.000658364
	GO:0010604~positive regulation of macromolecule metabolic process	90	4.84914	TLR1, MITF, FOXO1, NFKB1, RORA, PAWR, GLI2, 9430076C15RIK, ZIC3, SHH, TLR9, CITED2, FOS, ATOH1, BARX2, GPX4, TDGF1, IFNG, FGF1, FAM129A, PITX2, ATF7IP, ICOSL, SOX11, RXRA, OTX2, TTF1, SIX4, PRKCQ, EYA1, AYM1, TRIM32, VEGFA, SIX1, PRDM1, CLN6, HMGB1, CNBP, SOX2, SOX5, NUFIP1, NFYC, NFYB, EHF, TCF7L1, PLAGL1, HOXA1, REL, BCL2, NFAT5, ETV1, POU3F2, DYRK2, MAML3, ETV5, ETV4, FOXD3, CD28, TRP53, MAF, …	1.64561	2.40154e-06	0.000651006
	GO:0045935~positive regulation of nucleobase, nucleoside, nucleotide and nucleic acid metabolic process	76	4.09483	MITF, FOXO1, NFKB1, RORA, GLI2, 9430076C15RIK, SHH, ZIC3, CITED2, FOS, ATOH1, BARX2, GPX4, TDGF1, IFNG, GUCY1A2, PITX2, ATF7IP, SOX11, RXRA, OTX2, TTF1, SIX4, EYA1, AYM1, VEGFA, SIX1, HMGB1, CNBP, SOX2, SOX5, NUFIP1, NFYC, NFYB, EHF, TCF7L1, PLAGL1, HOXA1, REL, NFAT5, ETV1, POU3F2, MAML3, ETV5, ETV4, FOXD3, CD28, MAF, KLF5, CEBPA, TRP53, IL6, KAT2B, RFX4, TBX3, KLF12, KLF13, GSX1, TRIM28, SMAD4, …	1.72477	2.94225e-06	0.000736197
	GO:0045941~positive regulation of transcription	72	3.87931	MITF, FOXO1, NFKB1, RORA, GLI2, 9430076C15RIK, SHH, ZIC3, CITED2, FOS, ATOH1, BARX2, IFNG, TDGF1, PITX2, ATF7IP, RXRA, SOX11, OTX2, TTF1, SIX4, AYM1, VEGFA, SIX1, HMGB1, CNBP, SOX2, SOX5, NUFIP1, NFYC, NFYB, EHF, TCF7L1, PLAGL1, HOXA1, REL, NFAT5, ETV1, POU3F2, MAML3, ETV5, ETV4, FOXD3, MAF, KLF5, CEBPA, TRP53, IL6, KAT2B, RFX4, TBX3, KLF12, KLF13, GSX1, TRIM28, SMAD4, TEAD1, NR4A1, CREB5, SMAD2,…	1.75439	2.98501e-06	0.000693562
	GO:0035239~tube morphogenesis	35	1.88578	GNA13, WNT5A, COBL, ENAH, LMO4, DICER1, GJA1, GLI2, ZIC3, SHH, EDNRA, MAP3K7, SPRY2, BCL2, EGF, ETV4, PITX2, DLG1, TBX3, PDPN, SMAD4, FZD3, KDR, MYCN, EYA1, NCOA3, LAMA5, VEGFA, SIX1, TGIF1, PBX1, PTCH1, APAF1, IFT52, BMP7	2.36897	3.17525e-06	0.000688582
	GO:0045893~positive regulation of transcription, DNA-dependent	65	3.50216	MITF, FOXO1, NFKB1, RORA, GLI2, 9430076C15RIK, SHH, ZIC3, CITED2, FOS, ATOH1, BARX2, IFNG, TDGF1, PITX2, ATF7IP, RXRA, SOX11, OTX2, TTF1, SIX4, AYM1, VEGFA, SIX1, HMGB1, CNBP, SOX2, SOX5, NFYC, NUFIP1, NFYB, EHF, TCF7L1, PLAGL1, HOXA1, REL, NFAT5, POU3F2, MAML3, FOXD3, MAF, CEBPA, TRP53, IL6, KAT2B, RFX4, TBX3, KLF12, KLF13, GSX1, TRIM28, SMAD4, TEAD1, NR4A1, CREB5, SMAD2, AFF1, HDAC4, MEOX1, CSR…	1.80845	3.53894e-06	0.000719473
	GO:0010628~positive regulation of gene expression	73	3.93319	MITF, FOXO1, NFKB1, RORA, GLI2, 9430076C15RIK, SHH, ZIC3, CITED2, FOS, ATOH1, BARX2, IFNG, TDGF1, PITX2, ATF7IP, RXRA, SOX11, OTX2, TTF1, SIX4, AYM1, VEGFA, SIX1, PRDM1, HMGB1, CNBP, SOX2, SOX5, NUFIP1, NFYC, NFYB, EHF, TCF7L1, PLAGL1, HOXA1, REL, NFAT5, ETV1, POU3F2, MAML3, ETV5, ETV4, FOXD3, MAF, KLF5, CEBPA, TRP53, IL6, KAT2B, RFX4, TBX3, KLF12, KLF13, GSX1, TRIM28, SMAD4, TEAD1, NR4A1, CREB5,…	1.73137	4.12609e-06	0.000789472
	GO:0006350~transcription	205	11.0453	REST, RORA, CITED2, TAF5L, CDCA7, NKX6-3, PHTF2, PRIM2, CREB3L1, RCOR2, RREB1, RCOR1, RXRA, HMG20A, PTRF, PRDM5, MNT, TGIF1, VGLL3, PRDM1, ZFP825, CRTC3, MYBL2, ZFP619, ZFP618, ZSCAN5B, TRP53BP1, HIP1, KLF5, AEBP2, DNMT3A, KLF12, KLF9, ESRRB, SMAD7, KLF13, ASXL1, RYBP, SMAD4, SMAD2, ZBTB44, CSRNP2, RNF2, TRPS1, ZFP740, AIRE, MZF1, GM10324, RBPJ, KLF4, KLF3, ZBTB32, ELF3, MITF, NFKB1, 9430076C15RI…	1.33899	4.88861e-06	0.000883365
	GO:0051252~regulation of RNA metabolic process	176	9.48276	JDP2, APOBEC1, FOXO1, REST, RORA, ZIC3, SHH, FOXO6, CITED2, BATF, ATOH1, HOXC4, IFNG, TDGF1, NKX6-3, CREB3L1, PITX2, L3MBTL4, RXRA, MTA3, FOXN2, SIX4, ZFP120, SIX1, VEGFA, MNT, MGA, TGIF1, ZFP825, HMGB1, TSHZ2, CNBP, SOX2, SOX5, ELK3, ZFP619, MEIS1, ATF1, ZSCAN5B, PLAGL1, HOXA1, TRP53BP1, NPM1, TFDP2, MAML3, BHLHE40, SKIL, DBX1, KLF5, MDFI, TRP53, TAF1, DNMT3A, AEBP2, KLF12, RFX4, KLF13, ESRRB, S…	1.36898	7.42449e-06	0.00127074
	GO:0001944~vasculature development	44	2.37069	GNA13, RTN4, FGFR1, EMCN, TIPARP, DICER1, COL3A1, PRRX1, GJA1, FOXO1, ELK3, ENPEP, MMP2, MEIS1, SHH, GJC1, CITED2, TGFB2, EDNRA, ZFP36L1, MAP3K7, ATG5, TDGF1, ZC3H12A, HS6ST1, FGF1, PPAP2B, PITX2, SCG2, KLF5, TBX3, PDPN, SMAD7, ESX1, MYH9, FZD5, EPHA2, VASH1, KDR, PROK2, VEGFC, AGTR1B, VEGFA, RBPJ	2.03704	9.04625e-06	0.00147075
	GO:0048754~branching morphogenesis of a tube	23	1.23922	GNA13, WNT5A, TBX3, DICER1, SMAD4, GLI2, SHH, KDR, MYCN, EDNRA, SPRY2, EYA1, NCOA3, LAMA5, BCL2, VEGFA, SIX1, PBX1, BMP7, EGF, ETV4, DLG1, PITX2	2.86241	1.00413e-05	0.00155472
	GO:0001568~blood vessel development	43	2.31681	GNA13, RTN4, FGFR1, EMCN, TIPARP, DICER1, COL3A1, PRRX1, GJA1, FOXO1, ELK3, ENPEP, MMP2, MEIS1, SHH, GJC1, CITED2, TGFB2, EDNRA, ZFP36L1, MAP3K7, ATG5, TDGF1, ZC3H12A, HS6ST1, FGF1, PPAP2B, PITX2, SCG2, KLF5, TBX3, SMAD7, ESX1, MYH9, FZD5, EPHA2, VASH1, KDR, PROK2, VEGFC, AGTR1B, VEGFA, RBPJ	2.0397	1.12418e-05	0.00166139
	GO:0010605~negative regulation of macromolecule metabolic process	73	3.93319	JDP2, DICER1, PRRX1, BNIP3, MLH1, NFKB1, REST, GLI2, CBFA2T2, SHH, CITED2, EIF4EBP1, BARX2, ATG5, FAM129A, NRG1, KCNQ1, KHDRBS1, ATF7IP, TBL1XR1, NANOG, RCOR2, GRIN2A, TLE4, TTF1, KCNQ1OT1, TRAT1, INHBB, TGIF1, ZFPM1, SRP9, MTDH, HUS1, SOX2, TCF7L1, INPP5K, NPM1, AATF, SKIL, BHLHE40, TNRC6A, FOXD3, MDFI, CEBPA, TRP53, DNMT3A, IL6, TNFSF4, TBX3, KLF12, JARID2, ZFP57, TRIM28, FZD1, RYBP, NDFIP1, TR…	1.66978	1.47059e-05	0.00207842
	GO:0006355~regulation of transcription, DNA-dependent	172	9.26724	JDP2, FOXO1, REST, RORA, ZIC3, SHH, FOXO6, CITED2, BATF, ATOH1, HOXC4, IFNG, TDGF1, NKX6-3, CREB3L1, PITX2, L3MBTL4, RXRA, MTA3, FOXN2, SIX4, ZFP120, SIX1, VEGFA, MNT, MGA, TGIF1, ZFP825, HMGB1, TSHZ2, CNBP, SOX2, SOX5, ELK3, ZFP619, MEIS1, ATF1, ZSCAN5B, PLAGL1, HOXA1, TRP53BP1, TFDP2, MAML3, BHLHE40, SKIL, DBX1, KLF5, MDFI, TRP53, TAF1, DNMT3A, AEBP2, KLF12, RFX4, KLF13, ESRRB, SMAD7, GSX1, SMA…	1.35887	1.58357e-05	0.00214477
	GO:0050767~regulation of neurogenesis	28	1.50862	RTN4, DRD3, SOX2, SOX5, REST, GLI2, MEIS1, SHH, LINGO1, ATOH1, MAPT, BCL2, POU3F2, TLX3, TRP53, NLGN1, LMX1A, CTNNA1, NTN1, NKX6-1, VEGFC, EYA1, SIX1, NPTN, TGIF1, PBX1, BMP7, CACNA1A	2.45511	1.87362e-05	0.00243575
	GO:0051960~regulation of nervous system development	30	1.61638	RTN4, DRD3, SOX2, SOX5, REST, GLI2, MEIS1, SHH, LINGO1, ATOH1, MAPT, BCL2, IFNG, POU3F2, EGF, TLX3, TRP53, NLGN1, LMX1A, CTNNA1, NTN1, NKX6-1, VEGFC, EYA1, SIX1, NPTN, TGIF1, PBX1, BMP7, CACNA1A	2.3461	2.20093e-05	0.00275079
	GO:0048729~tissue morphogenesis	41	2.20905	FRAS1, WNT5A, COBL, ENAH, LMO4, FST, FEM1B, GLI2, TCF7L1, SHH, TGFB2, MAP3K7, WNT3, LY6E, MACF1, BCL2, ETV4, PITX2, DLG1, NANOG, NF2, TBX3, SMAD7, RXRA, SMAD4, FZD3, SMAD2, SNAI1, EPHA2, VEGFC, EYA1, NCOA3, LAMA5, SIX1, TGIF1, PBX1, PTCH1, APAF1, IFT52, BMP7, KLF4	1.99386	3.18839e-05	0.00383528
	GO:0048514~blood vessel morphogenesis	36	1.93966	RTN4, GNA13, FGFR1, EMCN, DICER1, TIPARP, PRRX1, GJA1, ELK3, ENPEP, MEIS1, SHH, GJC1, CITED2, TGFB2, EDNRA, MAP3K7, ZFP36L1, ATG5, TDGF1, ZC3H12A, HS6ST1, FGF1, PITX2, SCG2, KLF5, SMAD7, MYH9, FZD5, VASH1, EPHA2, KDR, PROK2, VEGFC, VEGFA, RBPJ	2.10438	3.34801e-05	0.00388337
	GO:0045944~positive regulation of transcription from RNA polymerase II promoter	55	2.96336	MITF, FOXO1, NFKB1, RORA, GLI2, SHH, ZIC3, CITED2, FOS, ATOH1, BARX2, TDGF1, PITX2, RXRA, SOX11, OTX2, TTF1, SIX4, AYM1, SIX1, VEGFA, HMGB1, CNBP, SOX2, SOX5, NUFIP1, TCF7L1, PLAGL1, HOXA1, NFAT5, POU3F2, MAML3, FOXD3, MAF, CEBPA, TRP53, IL6, KAT2B, KLF12, RFX4, KLF13, GSX1, SMAD4, TEAD1, NR4A1, SMAD2, HDAC4, MEOX1, CSRNP2, GTF2F2, PBX1, JAK3, BMP7, RBM14, KLF4	1.77814	3.5361e-05	0.00395996
	GO:0035295~tube development	44	2.37069	GNA13, WNT5A, HMGB1, FGFR1, COBL, ENAH, LMO4, DICER1, GJA1, GLI2, SHH, ZIC3, EDNRA, MAP3K7, SPRY2, BCL2, HS6ST1, EGF, FGF1, ETV4, PITX2, DLG1, CEBPA, TBX3, PDPN, SMAD4, FZD3, SMAD2, FOXP1, KDR, MYCN, TNS3, EYA1, NCOA3, LAMA5, SALL1, SIX1, VEGFA, TGIF1, PBX1, PTCH1, APAF1, IFT52, BMP7	1.92902	3.55882e-05	0.00385276
	GO:0007167~enzyme linked receptor protein signaling pathway	45	2.42457	FGFR1, FUT8, FGF15, BCAR1, TIPARP, FST, FOXO1, EPHA10, CLNK, TGFB2, MSX2, MAP3K7, EIF4EBP1, TEK, PALM2, PDGFC, SKIL, EGF, FGF1, PIK3R1, FGF4, TRP53, SMAD7, ARID5B, FLT4, SMAD4, SMAD2, EPHA2, KDR, PTPN11, EPHA5, EPHA4, SS18, VEGFC, GRB10, ZFP106, DOK2, DOK5, VEGFA, ROR2, JAK3, BMPR1B, BMP7, HPGD, AKAP2, CACNA1A	1.90782	3.76606e-05	0.00394542
	GO:0031327~negative regulation of cellular biosynthetic process	63	3.3944	JDP2, PRRX1, NFKB1, REST, GLI2, CBFA2T2, SHH, CITED2, EDNRA, EIF4EBP1, BARX2, NRG1, KHDRBS1, ATF7IP, TBL1XR1, NANOG, RCOR2, TTF1, TLE4, INHBB, TGIF1, ZFPM1, SRP9, MTDH, HUS1, SOX2, TCF7L1, AATF, SKIL, BHLHE40, TNRC6A, FOXD3, MDFI, CEBPA, TRP53, DNMT3A, IL6, TNFSF4, KLF12, TBX3, JARID2, ZFP57, TRIM28, RYBP, FZD1, ATP1A1, TRIM24, FOXP1, FXR1, HDAC4, ID2, TRPS1, RNF2, ZFP281, PHF21A, RFX3, HIVEP1, I…	1.69574	3.89501e-05	0.00395298
	GO:0006357~regulation of transcription from RNA polymerase II promoter	83	4.47198	JDP2, MITF, PRRX1, FOXO1, NFKB1, RORA, GLI2, SHH, ZIC3, CITED2, FOS, ATOH1, BARX2, TDGF1, PITX2, ELP4, ATF7IP, NANOG, SOX11, RXRA, OTX2, TLE4, TTF1, SIX4, MED4, AYM1, VEGFA, SIX1, TGIF1, ZFPM1, IRX4, HMGB1, CNBP, MTDH, SOX2, SOX5, NUFIP1, MEIS1, TCF7L1, PLAGL1, HOXA1, NFAT5, POU3F2, SKIL, MAML3, FOXD3, MDFI, MAF, CEBPA, TRP53, DNMT3A, IL6, KAT2B, RFX4, KLF12, JARID2, ZFP57, KLF13, GSX1, TRIM28, R…	1.5595	4.53749e-05	0.00446434
	GO:0000902~cell morphogenesis	49	2.64009	ENAH, UCHL1, CNP, GLI2, SHH, TGFB2, ATOH1, ROBO1, COL4A3BP, ROBO3, NRG1, CRYAA, PDPN, PRKCI, CTNNA1, MYH9, ECT2, MARK2, SS18, RELN, STMN1, CHL1, ADD1, BRSK1, IL7R, HOXA1, DOCK2, PRDM14, MACF1, BCL2, FAT1, ETV1, B3GNT2, ETV4, ESRRB, TRIM28, NFASC, NTNG2, LMX1A, AFG3L2, NTN1, PTPN11, EPHA4, LAMA5, RBPJ, BMPR1B, BMP7, APBB2, CACNA1A	1.83538	4.55499e-05	0.00435
	GO:0008284~positive regulation of cell proliferation	46	2.47845	HMGB1, FGFR1, CNBP, FGF15, SOX2, PRRX1, GLI2, SHH, TGFB2, ARHGAP5, BCL2, IFNG, NPM1, TDGF1, RTKN2, POU3F2, PDGFC, EGF, FGF1, FGFBP1, CD28, FGF4, SCG2, DLG1, KLF5, NANOG, ICOSL, IL6, TBX3, FLT4, LIFR, NTN1, FOXP1, KDR, MYCN, CD38, VEGFC, PRKCQ, TNS3, CD80, VEGFA, TGIF1, PBX1, RBPJ, MAB21L2, F2R	1.87468	4.7249e-05	0.00438328
	GO:0009890~negative regulation of biosynthetic process	63	3.3944	JDP2, PRRX1, NFKB1, REST, GLI2, CBFA2T2, SHH, CITED2, EDNRA, EIF4EBP1, BARX2, NRG1, KHDRBS1, ATF7IP, TBL1XR1, NANOG, RCOR2, TTF1, TLE4, INHBB, TGIF1, ZFPM1, SRP9, MTDH, HUS1, SOX2, TCF7L1, AATF, SKIL, BHLHE40, TNRC6A, FOXD3, MDFI, CEBPA, TRP53, DNMT3A, IL6, TNFSF4, KLF12, TBX3, JARID2, ZFP57, TRIM28, RYBP, FZD1, ATP1A1, TRIM24, FOXP1, FXR1, HDAC4, ID2, TRPS1, RNF2, ZFP281, PHF21A, RFX3, HIVEP1, I…	1.68011	5.15112e-05	0.00464534
	GO:0045165~cell fate commitment	29	1.5625	FGFR1, MITF, SOX2, SOX5, GLI2, SHH, TGFB2, SPRY2, ATOH1, WNT3, PRDM14, BCL2, FGF1, NRG1, TLX3, DBX1, TRP53, NANOG, OTX2, GSX1, SMAD4, SMAD2, NKX6-1, KDR, EYA1, SALL1, SIX1, PRDM1, RBPJ	2.28333	5.16061e-05	0.00452838
	GO:0030182~neuron differentiation	58	3.125	ENAH, UCHL1, CNP, RORA, GLI2, SHH, TGFB2, ATOH1, ROBO1, ROBO3, NRG1, USH2A, KCNMA1, OTX2, MDGA2, PRKCI, VEGFA, RELN, STMN1, CLN8, CHL1, FGFR1, IRX5, SOX2, SOX5, BRSK1, HOXA1, LINGO1, BCL2, ETV1, POU3F2, B3GNT2, TLX3, ETV4, DBX1, SCLT1, MCF2, GSX1, NTN4, SMAD4, NFASC, NTNG2, LMX1A, AFG3L2, NTN1, EPHA2, NKX6-1, PTPN11, SALL3, EPHA4, PPP1R9A, HDAC2, ID3, APBB2, BMP7, BMPR1B, RBPJ, CACNA1A	1.68245	0.000102874	0.008771
	GO:0044057~regulation of system process	35	1.88578	CPLX4, IRX5, GLRA1, EDN2, GRIK3, SNCA, CTNND2, NCS1, GJA1, PINK1, CSPG5, TGFB2, GRIN2B, IFNG, BHLHE40, LGI1, TLX3, CAMK2A, KCNMA1, SMAD7, GRIN2A, NLGN1, ATP1A1, PARK2, GRM1, PTPN11, GRM5, INHBB, HDAC4, PROK2, NPTN, RYR2, USP46, CACNA1A, F2R	2.01539	0.000106878	0.00887829
	GO:0010558~negative regulation of macromolecule biosynthetic process	60	3.23276	JDP2, PRRX1, NFKB1, REST, GLI2, CBFA2T2, SHH, CITED2, EIF4EBP1, BARX2, NRG1, KHDRBS1, ATF7IP, TBL1XR1, NANOG, RCOR2, TTF1, TLE4, INHBB, TGIF1, ZFPM1, SRP9, MTDH, HUS1, SOX2, TCF7L1, AATF, SKIL, BHLHE40, TNRC6A, FOXD3, MDFI, CEBPA, TRP53, DNMT3A, IL6, TNFSF4, KLF12, TBX3, JARID2, ZFP57, TRIM28, RYBP, FZD1, TRIM24, FOXP1, FXR1, HDAC4, ID2, TRPS1, RNF2, ZFP281, PHF21A, HIVEP1, RFX3, ID3, SCMH1, RBPJ…	1.66135	0.000110027	0.00891127
	GO:0008360~regulation of cell shape	14	0.75431	GNA13, FGD1, PDPN, ARHGEF18, FBLIM1, MYH9, ARHGAP15, EPB4.1L2, SLC26A5, FYN, PALM2, CFDP1, ARAP3, CDC42EP3, AKAP2	3.44761	0.000120173	0.00949287
Cellular components	GO:0030054~cell junction	70	3.77155	ENAH, LIMA1, GLRA1, GABRB3, CADM1, SYT4, CLDN4, CLDN3, GLRA3, GRIK3, BCAR1, UTRN, NCS1, GJA1, SYT9, NBEA, RPS6KB1, ZNRF1, TMEM178, ARHGAP21, PCDH1, GRIN2B, GOPC, PARD3B, DLG5, LGI1, DPP4, DLG1, PARVG, ANKS1B, ARC, MAGI2, GRIN2A, FBLIM1, PTPRU, AJAP1, MYH9, RPH3A, CTNNA1, FLNB, PCLO, ARHGAP26, JUP, TNS3, ARHGAP32, VAMP3, ERC2, JAM2, PARVB, CPLX4, MTDH, CTNND2, GJC1, PVRL1, FAT1, SYN3, PVRL3, CAMK2…	1.89643	2.42108e-07	0.000109669
	GO:0045202~synapse	52	2.80172	ENAH, GLRA1, CADM1, SYT4, GABRB3, GLRA3, GRIK3, UTRN, NCS1, SYT9, NBEA, RPS6KB1, ZNRF1, PLCB4, GRIN2B, GOPC, NRG1, LGI1, DLG1, KCNMA1, ANKS1B, ARC, MAGI2, GRIN2A, NRXN1, MYH9, RPH3A, PPP1CC, PCLO, GRM1, ARHGAP32, GRM7, NPTN, VAMP3, ERC2, CPLX4, NUFIP1, SYN3, DTNB, CAMK2A, GABRP, DLGAP1, GLRB, DLGAP3, DLGAP2, NLGN1, PARK2, ITPR1, HDAC4, EPS8, SNTA1, F2R	2.07563	7.27536e-07	0.000164773
	GO:0014069~postsynaptic density	17	0.915948	ANKS1B, DLGAP1, ARC, DLGAP3, DLGAP2, NCS1, NLGN1, GRIN2A, PARK2, GRM1, ITPR1, ARHGAP32, PLCB4, GRIN2B, EPS8, GOPC, DLG1	4.2444	9.48955e-07	0.000143282
	GO:0043005~neuron projection	43	2.31681	NRP2, HMGB1, TNFRSF21, GABRB3, SYT4, CADM1, GRIK3, UTRN, UCHL1, NCS1, KATNB1, BNIP3, TTLL7, DTNBP1, IQGAP1, TGFB2, PLCB4, INPP5K, GRIN2B, ROBO1, MAPT, GOPC, KCNMA1, PTPRK, ANKS1B, ARC, OPA1, KIF5A, GRIN2A, NFASC, SLC7A10, PARK2, BASP1, GRM1, DCTN2, NCAM2, ARHGAP32, PPP1R9A, FKBP15, RELN, ERC2, CACNA1A, CHL1	2.23481	1.09579e-06	0.000124091
	GO:0044456~synapse part	38	2.04741	GLRA1, SYT4, CADM1, GABRB3, GLRA3, GRIK3, NCS1, NUFIP1, SYT9, NBEA, PLCB4, GRIN2B, SYN3, GOPC, CAMK2A, GABRP, DLG1, KCNMA1, ANKS1B, DLGAP1, GLRB, ARC, DLGAP3, DLGAP2, GRIN2A, NLGN1, PARK2, NRXN1, RPH3A, GRM1, ITPR1, ARHGAP32, EPS8, GRM7, NPTN, ERC2, SNTA1, F2R	2.28237	3.07341e-06	0.000278413
	GO:0005886~plasma membrane	288	15.5172	LYPD4, SYT4, CADM1, OSMR, ADCY6, SNCA, UTRN, SYT9, SGMS1, ZNRF1, SHH, CDH22, LPHN2, CD47, CDH20, ATP2B4, DIRAS2, GRIN2B, OSCAR, RAB25, HTR1D, RAPGEF2, TYRO3, ICOSL, ARC, MAGI2, GPR133, PDPN, MDGA2, LIFR, GRIN2A, PTPRU, MYH9, CTNNA1, PCLO, MARK2, JUP, RND1, PTRF, RHCG, RAB19, TMPRSS11D, VEGFA, NPTN, ROR2, TMPRSS11A, ADD1, EMCN, ENPP1, RTP1, ASAP2, MME, ADRB3, PVRL1, UPK1A, PVRL3, EFR3A, NUP54, TRP…	1.26193	3.51304e-06	0.0002652
	GO:0042995~cell projection	76	4.09483	NRP2, RTN4, ENAH, GABRB3, CADM1, TTLL8, SYT4, BCAR1, GRIK3, UTRN, UCHL1, NCS1, BNIP3, ENPEP, TTLL7, GLI2, IQGAP1, TGFB2, ACTR2, PLCB4, GRIN2B, ROBO1, SLC2A2, MAPT, TTC30B, GOPC, USH2A, AKT2, DLG1, RAB27A, KCNMA1, PTPRK, ANKS1B, ARC, OPA1, KIF5A, PDPN, GRIN2A, SLC7A10, BASP1, MYH9, CNGA3, CTNNA1, GRM1, DCTN2, NCAM2, ARHGAP32, EFHC1, GTF2I, DNAHC7A, ITGB1BP1, FKBP15, RELN, ERC2, CHL1, SLC27A4, MYO5…	1.683	7.13236e-06	0.000461461
	GO:0044459~plasma membrane part	173	9.32112	F2RL2, GNA13, KCNC2, GNA14, ENAH, GABRB3, SYT4, CADM1, OSMR, GRIK3, OLFR156, UTRN, TLR2, SYT9, RPS6KB1, ENPEP, ZNRF1, CD47, ATP2B4, DIRAS2, GRIN2B, ROBO1, TDGF1, SPRED2, RAB25, PARD3B, LGI1, ICOSL, ARC, MAGI2, GRIN2A, MFGE8, PTPRU, AJAP1, CTNNA1, RPH3A, NUPL2, MYH9, PCLO, TRAT1, JUP, TNS3, RND1, PTRF, RHCG, TMPRSS11D, RAB19, ROR2, TMPRSS11A, VAMP3, ERC2, AKAP2, ADD1, FRAS1, ITGB5, EPHA10, TTC8, A…	1.34895	1.94574e-05	0.00110118
	GO:0015629~actin cytoskeleton	35	1.88578	MYO5A, MTSS1, LIMA1, ENAH, SRCIN1, UTRN, STK17B, MACF1, MYO5C, KAT2B, ACTA2, MYO3B, MYLPF, MYO1F, DCTN6, CSRP1, MYH9, CTNNA1, RPH3A, FLNB, PTPN11, DCTN2, EPB4.1L2, JUP, HDAC4, ARHGAP32, PPP1R9A, MYO10, TRIM32, MYO16, FKBP15, WDR1, ABL2, MYO18A, MYH7B	2.17396	2.3401e-05	0.00117717
	GO:0005856~cytoskeleton	124	6.68103	MTSS1, DYNC1LI2, ENAH, TUBB2B, SRCIN1, SEPT1, UTRN, SNCA, KIFC3, HOOK1, GRIN2B, DISC1, KIF13B, ARC, TWF2, KIF5A, ENC1, MYO3B, GRIN2A, DCTN6, PLK1S1, CTNNA1, RPH3A, MYH9, DCTN2, JUP, RND1, NAV1, TRIM32, SNTG1, STMN1, ERC2, MYO18A, MYH7B, ADD1, FGD1, LMNB1, STK17B, AKAP12, KATNB1, TTC8, CORO2B, DOCK2, MACF1, NPM1, EFR3A, PPP2R2B, CDC42EP3, PTPN4, PTPN14, MYO1F, MYLPF, CSRP1, PTPN11, HDAC4, FNBP1, M…	1.40723	6.38171e-05	0.00288683
	GO:0045211~postsynaptic membrane	24	1.2931	KCNMA1, ANKS1B, DLGAP1, ARC, GLRB, GLRA1, DLGAP3, GABRB3, DLGAP2, GRIK3, GLRA3, NCS1, NLGN1, GRIN2A, NBEA, PARK2, GRM1, ARHGAP32, GRIN2B, GOPC, DLG1, F2R, SNTA1, GABRP	2.42537	0.0001094	0.0044954
	GO:0005667~transcription factor complex	36	1.93966	IRX4, E2F2, E2F7, LMO4, E2F8, SOX2, NFYC, NFYB, MEIS1, ATF1, FOS, BARX2, GTF2A1, TFDP2, POU3F2, PITX2, FOXD3, CEBPA, ATF7IP, TAF1, RBL2, RCOR2, CCNH, SMAD7, SMAD4, TEAD1, SMAD2, DACH1, NRF1, GTF2F2, SIX1, ATP6V0A1, MGA, PBX1, RBPJ, RBM14	1.95895	0.000156706	0.00589864
Molecular functions	GO:0003677~DNA binding	219	11.7996	REST, RORA, CITED2, HIST1H2BL, NKX6-3, PHTF2, PRIM2, H2AFZ, CREB3L1, PITX2, L3MBTL4, RCOR2, RREB1, POLG, RCOR1, RXRA, HMG20A, MTF2, PRDM5, MNT, TGIF1, PRDM2, PRDM1, MYBL2, ZFP618, ZSCAN5B, PLAGL1, TRP53BP1, KLF5, AEBP2, DNMT3A, DHX9, KLF12, KLF9, KLF13, ESRRB, SMAD7, RYBP, SMAD4, SMAD2, ZBTB44, NKX6-1, CSRNP2, ETS2, TRPS1, AIRE, MZF1, RBPJ, KLF4, KLF3, BTBD11, ELF3, ZMAT4, MITF, MLH1, NFKB1, GLI2…	1.46675	1.13013e-09	1.05667e-06
	GO:0030528~transcription regulator activity	159	8.56681	JDP2, FOXO1, REST, RORA, FOXO6, CITED2, BATF, TAF5L, ATOH1, OLIG3, HOXC4, NKX6-3, CREB3L1, PITX2, L3MBTL4, RCOR2, RXRA, MTA3, FOXN2, SIX4, GRHL2, ELL2, PTRF, GTF2IRD1, SIX1, PRDM5, MNT, MGA, TGIF1, PRDM2, VGLL3, TSHZ2, SOX2, SOX5, ELK3, MEIS1, ATF1, ZSCAN5B, HOXA1, TFDP2, MAML3, SKIL, BHLHE40, DBX1, KLF5, TRP53, AEBP2, KLF12, RFX4, KLF9, KLF13, SMAD7, ESRRB, GSX1, SMAD4, RYBP, TEAD1, NR4A1, SMAD2…	1.57262	3.55181e-09	1.66047e-06
	GO:0003700~transcription factor activity	111	5.9806	JDP2, FOXO1, RORA, FOXO6, CITED2, BATF, HOXC4, NKX6-3, CREB3L1, PITX2, L3MBTL4, RCOR2, RXRA, MTA3, FOXN2, SIX4, GRHL2, GTF2IRD1, SIX1, MNT, MGA, TGIF1, TSHZ2, SOX2, SOX5, ELK3, MEIS1, ATF1, ZSCAN5B, HOXA1, TFDP2, DBX1, TRP53, KLF5, KLF12, ESRRB, SMAD7, GSX1, SMAD4, TEAD1, NR4A1, SMAD2, ESX1, FOXP1, NKX6-1, ATF6, NRF1, HDAC2, CSRNP2, ETS2, TRPS1, EBF1, MZF1, RBPJ, KLF4, ISX, E2F2, ELF3, E2F7, MITF…	1.70622	1.86507e-08	5.81277e-06
	GO:0043565~sequence-specific DNA binding	79	4.25647	ISX, JDP2, ELF3, MITF, PRRX1, FOXO1, RORA, GLI2, 9430076C15RIK, FOXO6, BATF, FOS, ATOH1, BARX2, HOXC4, NKX6-3, CREB3L1, NFIL3, PITX2, NANOG, RAX, SOX13, SOX11, RXRA, MTA3, OTX2, FOXN2, TLE4, SIX4, NCL, PRDM5, SIX1, TGIF1, IRX4, TSHZ2, IRX6, IRX5, SOX2, NFYC, NFYB, EHF, ELK3, MEIS1, ATF1, MSX2, HOXA1, STAT4, TRP53BP1, ETV1, POU3F2, TLX3, ETV6, ETV5, ETV4, DBX1, FOXD3, MAF, CEBPA, ERG, MSH3, TBX3, …	1.69483	3.65081e-06	0.000853015
	GO:0003682~chromatin binding	30	1.61638	MKRN1, MITF, SOX2, ARID4B, REST, GLI2, CHD9, ATOH1, BARX2, SKIL, PHC1, PITX2, TRP53, DNMT3A, RFX4, SMAD4, TLE4, TTF1, SMAD2, TRIM24, FOXP1, NCOA3, MEOX1, SMARCC1, RNF2, AIRE, ATP6V0A1, TGIF1, PHF21A, RBPJ	2.30868	3.08968e-05	0.00576113
	GO:0043167~ion binding	388	20.9052	SLC9A9, FHIT, LTBP2, REST, RORA, CDH22, MAP3K7, CDH20, GRIN2B, FSTL5, L3MBTL4, RREB1, CRTAC1, RXRA, GRIN2A, PCLO, MARK2, ADAMTS8, RYR2, CHORDC1, MGAT5B, ACP5, DUSP12, ZSCAN5B, CDADC1, GPD2, DNMT3A, ZC3H13, MGAT4A, KLF12, ESRRB, KLF13, ASXL1, ACACA, ATP11B, ATP11C, PCDH17, TRPS1, MZF1, TLL1, LIMA1, GLRA1, GLRA3, ATP10A, STAC3, RNF182, LATS2, GUCY1A2, DPEP3, SIK1, KCNG3, CAR10, CACNG8, CACNG7, FBLI…	1.17645	5.48152e-05	0.00850589
	GO:0046872~metal ion binding	380	20.4741	SLC9A9, FHIT, SYT4, LTBP2, ATP1B3, ADCY8, ATP1B2, ADCY6, UTRN, SYT9, EDIL3, RORA, REST, ZNRF1, DNASE1L3, BC026585, CDH22, MAP3K7, CDH20, GRIN2B, STAC, PLOD3, PRIM2, FSTL5, L3MBTL4, RNF220, POLG, CRTAC1, RREB1, RXRA, GRIN2A, CYP26A1, PCLO, TANK, MARK2, ADAMTS8, MTF2, UBR5, PRDM5, RYR2, PRDM2, PRDM1, CHORDC1, ZFP825, ADD1, MGAT5B, ENPP1, ENPP3, ASAP2, ACP5, MME, SFXN1, DUSP12, ASAP3, ZFP619, ZSCAN5…	1.17733	6.70651e-05	0.00891827
Kegg pathway	mmu05200:Pathways in cancer	55	2.96336	E2F2, FGF15, MITF, MLH1, FOXO1, NFKB1, GLI2, MMP2, SHH, TGFB2, CCNE1, FOS, MAX, WNT3, FGF1, FGF4, AKT2, HSP90AA1, RXRA, RUNX1T1, FADD, CDK6, CTNNA1, PRKCB, DAPK1, JUP, VEGFC, VEGFA, LAMC2, WNT5A, FGFR1, WNT5B, EGLN3, TCF7L1, BCL2, PIK3R5, EGF, WNT8A, PIK3R1, TRAF3, CEBPA, TRP53, IL6, MSH3, SMAD4, FZD1, SMAD2, FZD3, FZD5, STAT1, FZD7, HDAC2, LAMA5, PTCH1, ABL1	1.98186	8.27217e-07	0.000146407
Tissue	Brain	720	38.7931	TUBB2B, PPP2R5C, CCDC148, STRN, RORA, ANKLE2, OLFR1359, CITED2, KIFC3, CDH22, LPHN2, DIRAS2, CDCA7, GRIN2B, RAE1, INTS6, FSTL5, OSCAR, LSM5, A830018L16RIK, PTBP2, HTR1D, QRFP, RAB27A, PTPRK, TMEFF2, TYRO3, OPA1, TNIK, MAGI2, CRTAC1, RREB1, KIF5A, RCOR2, RCOR1, RXRA, UGCG, GRIN2A, SIPA1L2, MYH9, CTNNA1, PCLO, PTPRO, BTBD9, MARK2, TMEM131, GRB10, PIRA6, ROR2, RYR2, GM12070, MYO18A, SH3GL2, GATSL2, …	1.21951	3.59947e-12	9.35858e-10
	Embryo	230	12.3922	MRPL42, OXA1L, UTRN, LUZP1, EDIL3, SGMS1, SHH, CDCA7, AGPS, COL4A3BP, PLOD3, INTS6, ABCB10, RAB25, VPS13A, SDR9C7, WWOX, ARC, TNIK, 4921524J17RIK, RAN, RREB1, BYSL, HMG20A, PTPRU, DCTN6, MYH9, MARK2, RND3, SERBP1, MNT, HAS2, MRPL45, GM12070, SH3GL2, PNMA1, OLFM4, ACP6, DUSP12, SFXN1, ZFP619, ZFP618, VRK2, SPATS1, PVRL3, LETMD1, MAML3, CDC42EP3, MDFI, DNMT3A, DHX9, TRPC6, SMAD7, NDFIP1, PPA2, ZFP6…	1.37961	2.0432e-07	2.65613e-05
	Thymus	260	14.0086	LDHD, UTRN, CCDC148, HS2ST1, BC026585, DIRAS2, CDCA7, AGPS, COL4A3BP, PLOD3, PRIM2, PHTF2, INTS6, H2AFZ, VPS13A, PTBP2, NSMAF, OPTC, 2700049A03RIK, ICOSL, RNF220, TNIK, RAN, HMG20A, DCTN6, TANK, BTBD9, CD38, RND1, PTRF, NAV1, NAV2, RAB19, SERBP1, NPTN, HAS2, GRAP2, LMNB1, ENPP1, HUS1, STK17B, TMEM229B, GPD1L, MACF1, EFR3A, EMB, NUP54, DHX9, CCDC86, TAOK1, CLCC1, EPM2A, PTPN14, NPL, SMAD2, CSRP1, …	1.2913	6.3962e-06	0.000554185
	Cerebellum	176	9.48276	MKRN1, LSM6, XPO4, F13A1, LMO4, RAB3GAP1, PPP2R5C, SYT9, EDIL3, RORA, GDAP1L1, ZNRF1, ZIC1, MTHFD1L, ZIC3, FAM49A, ST3GAL2, WNT3, GRIN2B, RAE1, COL4A3BP, ARL15, FSTL5, PHTF2, GM5089, PDGFC, PTBP2, UNC5C, WWOX, TYRO3, TNIK, PTPRN2, LRRC1, LRP1B, VTI1A, CD38, NAV1, NAA20, LYST, PRDM5, 5730522E02RIK, 1500012F01RIK, RELN, GM12070, SH3GL2, SLC38A9, RTP1, DENND2A, ASTN2, FXYD6, ZMYND8, CSMD1, CORO2B, T…	1.37977	7.40615e-06	0.000481286
	Lung	150	8.0819	RBPMS2, OXA1L, ATOX1, PITPNA, F13A1, CCDC85A, UTRN, CD209G, ZNRF1, CRADD, SHH, AGPS, 8430419L09RIK, ROBO1, PLOD3, LSM5, DDX10, UNC5C, 2010111I01RIK, BYSL, RXRA, HMG20A, PTPRU, CTNNA1, VTI1A, NEBL, MARK2, AGTR1B, SERBP1, IGSF3, USO1, LAMC2, VAMP3, GM12070, CRTC3, CNBP, GSDMD, ELK3, TIMP3, CMPK2, RASAL2, RPL10L, NPM1, TEK, TFDP2, RTKN2, AUTS2, NDRG1, FBXO3, GPD2, CPNE8, PVT1, GM16515, SMAD4, NR4A1,…	1.38655	2.92139e-05	0.00151799
	Macrophage	79	4.25647	RTN4, GPR84, LIMA1, CADM1, UTP18, TLR1, TLR2, LUZP1, IQGAP1, TLR9, MAP3K7, AGPAT9, PUM1, SPRED1, RAPGEF2, FAM129A, GOLGA3, AP3B1, ARGLU1, BYSL, LYPLA1, MYH9, NCL, SLC7A11, MARK2, TNS3, CD86, NAV1, NCOA3, ATP9B, SERBP1, FRMD4A, RIN2, BMP2K, FKBP15, VAMP3, RAB12, MFSD11, STMN1, SLC38A2, SLC38A9, LMNB1, FGR, TRA2B, VIM, ZDHHC18, GNG12, CEP55, NUFIP2, 2310022A10RIK, PVRL1, MACF1, NPM1, EFR3A, AATF, S…	1.58596	4.75568e-05	0.00205872
	Spinal cord	67	3.60991	GM5458, GLRA3, LRTM1, UTRN, RBM4, FOXO1, PLEKHB2, TRIM2, GM10556, 8430419L09RIK, ROBO1, GM5148, IL1RAP, PARD3B, ELP4, METTL8, PTPRK, A330070K13RIK, L3MBTL4, MAGI2, CRTAC1, PTPRG, PTPRN2, MDGA2, ADIPOR2, MYH9, 2610034B18RIK, DCTN2, ZDHHC17, NAV2, HRASLS, INPP4B, NINJ2, EPHA10, TMCC3, NECAB1, ADAT1, RASAL2, CHD9, CDC123, SEC16A, TFDP2, INPP5F, POU3F2, GLO1, SKIL, SCARB2, PPP2R2B, PIK3R1, BCL9, DCTD…	1.5868	0.000185074	0.00685124
	Eye	160	8.62069	ATP1B3, SYT4, RBM4, STRN, CSPG5, HOOK1, KLHL8, ANKRD54, CDH20, DDX18, PUM1, PITPNC1, FAM53B, DDX10, PITX2, ARGLU1, TWF2, CRYAA, KIF5A, RPH3A, CNGA3, RIC8B, YTHDF3, VASH1, GRB10, SGSM1, PTRF, NAV1, 1110018G07RIK, UBR5, SERBP1, SLC25A36, CELF4, USO1, GM12070, FRAS1, AKAP12, EPHA10, LRIG3, VIT, ABCA4, TMEM229B, ZMYND8, CORO2B, GPD1L, DOCK1, VRK2, MACF1, HNRNPF, CDC123, PLCH1, TFDP2, EMB, FBXO3, SLC3…	1.31947	0.000188465	0.00610698
